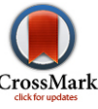

# Therapeutic Effects of Glutamic Acid in Piglets Challenged with Deoxynivalenol

Miaomiao Wu<sup>1,2,3</sup>, Hao Xiao<sup>1,2,3</sup>, Wenkai Ren<sup>1,2</sup>, Jie Yin<sup>1,2</sup>, Bie Tan<sup>1</sup>, Gang Liu<sup>1</sup>, Lili Li<sup>1</sup>, Charles Martin Nyachoti<sup>3</sup>, Xia Xiong<sup>1\*</sup>, Guoyao Wu<sup>1,4</sup>

**1** Scientific Observing and Experimental Station of Animal Nutrition and Feed Science in South-Central China, Ministry of Agriculture, Hunan Provincial Engineering Research Center of Healthy Livestock Key Laboratory of Agro-Ecological Processes in Subtropical Region, Institute of Subtropical Agriculture, Chinese Academy of Sciences, Changsha, Hunan, China, **2** University of Chinese Academy of Sciences, Beijing, China, **3** Department of Animal Science, University of Manitoba, Winnipeg, Canada, **4** Department of Animal Science, Texas A&M University, College Station, Texas, United State of America

## Abstract

The mycotoxin deoxynivalenol (DON), one of the most common food contaminants, primarily targets the gastrointestinal tract to affect animal and human health. This study was conducted to examine the protective function of glutamic acid on intestinal injury and oxidative stress caused by DON in piglets. Twenty-eight piglets were assigned randomly into 4 dietary treatments (7 pigs/treatment): 1) uncontaminated control diet (NC), 2) NC+DON at 4 mg/kg (DON), 3) NC+2% glutamic acid (GLU), and 4) NC+2% glutamic acid + DON at 4 mg/kg (DG). At day 15, 30 and 37, blood samples were collected to determine serum concentrations of CAT (catalase), T-AOC (total antioxidant capacity), H<sub>2</sub>O<sub>2</sub> (hydrogen peroxide), NO (nitric oxide), MDA (maleic dialdehyde), DAO (diamine oxidase) and D-lactate. Intestinal morphology, and the activation of Akt/mTOR/4EBP1 signal pathway, as well as the concentrations of H<sub>2</sub>O<sub>2</sub>, MDA, and DAO in kidney, liver and small intestine, were analyzed at day 37. Results showed that DON significantly ( $P<0.05$ ) induced oxidative stress in piglets, while this stress was remarkably reduced with glutamic acid supplementation according to the change of oxidative parameters in blood and tissues. Meanwhile, DON caused obvious intestinal injury from microscopic observations and permeability indicators, which was alleviated by glutamic acid supplementation. Moreover, the inhibition of DON on Akt/mTOR/4EBP1 signal pathway was reduced by glutamic acid supplementation. Collectively, these data suggest that glutamic acid may be a useful nutritional regulator for DON-induced damage manifested as oxidative stress, intestinal injury and signaling inhibition.

**Citation:** Wu M, Xiao H, Ren W, Yin J, Tan B, et al. (2014) Therapeutic Effects of Glutamic Acid in Piglets Challenged with Deoxynivalenol. PLoS ONE 9(7): e100591. doi:10.1371/journal.pone.0100591

**Editor:** Marinus F.W. te Pas, Wageningen UR Livestock Research, Netherlands

**Received:** March 5, 2014; **Accepted:** May 26, 2014; **Published:** July 1, 2014

**Copyright:** © 2014 Wu et al. This is an open-access article distributed under the terms of the Creative Commons Attribution License, which permits unrestricted use, distribution, and reproduction in any medium, provided the original author and source are credited.

**Funding:** This research was jointly supported by grants from the National Key Basic Research of China (NO. 2009CB118806), the National Natural Science Foundation of China (NO. 31272463 and NO.31072042), Hunan Provincial Natural Science Foundation of China (NO. 12JJ2014, 13JJ2034) and Chinese Academy of Sciences Visiting Professorship for Senior International Scientists Grant No. 2011T2S15. Meanwhile, the authors also give their profound admiration and respect to the many researchers in this field and in their lab, whose dedication and hard work make it. The funders had no role in study design, data collection and analysis, decision to publish, or preparation of the manuscript.

**Competing Interests:** The authors have declared that no competing interests exist.

\* Email: xx@isa.ac.cn

These authors contributed equally to this work.

## Introduction

Deoxynivalenol (DON) is the most pervasive mycotoxin, which are found worldwide in various foods and animal feeds [1–3]. The initial adverse effects observed after DON exposure are reduced feed intake, emesis, diarrhea, and anorexia [4]. DON becomes a serious problem in animal production worldwide, especially in pigs, because of its adverse effects on brain, liver, kidney, and mostly gastrointestinal tract [5–10]. These adverse effects include the inhibitions of DNA, RNA and protein synthesis, and lesions in the gastrointestinal tract, affecting its barrier function, as well as modulation of the anti-oxidative system [9,11–14]. Although DON causes a big economical loss to swine production, little has been done to investigate the nutritional strategy that may be useful in protecting pigs from the damage caused by consuming DON in contaminated diets.

Glutamic acid, a functional amino acid, plays various crucial roles in the intestinal tract, including (1) substrate for various metabolic pathways [15,16], (2) energy source for intestinal

mucosa [17], (3) mediator for cell signaling [18,19], (4) regulator for oxidative reactions [20,21], as well as immune responses and barrier function [22,23].

Considering the known functions of glutamic acid in intestine, we hypothesized that dietary glutamic acid supplementation may ameliorate the toxic effects of DON. Therefore, the objective of the current study was to investigate the effects of glutamic acid supplementation on the oxidative stress, intestinal barrier loss and protein inhibition induced by DON in piglets.

## Materials and Methods

### Preparation of DON-contaminated feed

*Fusarium graminearum*R6576, producing DON, was kindly provided by Huazhong Agricultural University (Wuhan, China). The DON-contaminated feed was prepared according to the previous reports from our group [13,14].

**Table 1.** Deoxynivalenol content in different dietary groups.

| Item            | NC group  | DON group | GLU group | DG group  |
|-----------------|-----------|-----------|-----------|-----------|
| Content (mg/kg) | 1.09±0.04 | 3.97±0.05 | 1.01±0.01 | 4.04±0.03 |

Pigs (7 pigs/group) were fed with uncontaminated basal diet (NC), or basal diet contaminated with deoxynivalenol at dose of 4 mg/kg (DON), or uncontaminated basal diet supplemented with 2% glutamic acid (GLU), or DON diet supplemented with 2% glutamic acid (DG). Deoxynivalenol content was determined using an assay kit in accordance with the manufacturer's instructions (Cusabio, China).

doi:10.1371/journal.pone.0100591.t001

## Experimental design

This study was conducted according to the guidelines of the Declaration of Helsinki, and animal protocols were approved by the animal welfare committee of the Institute of Subtropical Agriculture, Chinese Academy of Sciences. A total of 28 pigs (Landrace×Large White) (ZhengHong Co., China) weaned at 28 days of age with a mean body weight (BW) of 12.3±2.3 kg, were subjected to four treatments (n=7 per group): 1) NC group, weaning pigs received uncontaminated basal diets; 2) DON group, weaning pigs received 4 mg/kg deoxynivalenol-contaminated diets; 3) GLU group, weaning pigs received dietary 2% glutamic acid supplementation; 4) DG group, weaning pigs received 4 mg/kg deoxynivalenol diets and dietary 2% glutamic acid supplementation. The concentrations of DON in different groups shown in Table 1. The basal diets [13] were prepared from corn, soybean meal, wheat bran, limestone, CaHPO<sub>4</sub>, salt, and additive premix to meet or exceed the nutritional requirements of growing pig as recommended by the NRC (1998) (Table 2). Glutamic acid was added to the feed and mixed uniformly.

The experiment was arranged as a randomized design. Experiment animals were allowed free access to water throughout the experimental period. The trial period lasted for 37 days. At day 37, piglets were anesthetized with sodium pentobarbital and killed by jugular puncture. Jejunum and ileum were collected for intestinal mucosal morphology, diamine oxidase (DAO), maleic

dialdehyde (MDA), total antioxidant capacity (T-AOC), and some signal proteins analysis. Liver and kidney also were collected to detect MDA, DAO, hydrogen peroxide (H<sub>2</sub>O<sub>2</sub>) and T-AOC. Serum were prepared on day 15, 30 and 37 for catalase (CAT), MDA, nitric oxide (NO), H<sub>2</sub>O<sub>2</sub> and amino acids levels determination. Plasma were prepared on day 15, 30 for D-lactate and DAO determination.

## Antioxidation capacity, D-lactate and amino acids levels analysis

Spectrophotometric kits was used to analyze several parameters in samples, including CAT activities, and MDA, NO and H<sub>2</sub>O<sub>2</sub> levels in the serum; T-AOC activity; and MDA and H<sub>2</sub>O<sub>2</sub> levels in the liver and kidney; as well as T-AOC activity and MDA level in the jejunum and ileum. The protocol was conducted according to the manufacturer's instructions (Nanjing Jiancheng Biotechnology Institute, China). The reaction system for determining DAO concentration included 0.1 ml (4 µg) horseradish peroxidase solution (Sigma), 3 ml 0.2 M, pH 7.2 PBS, 0.1 ml O-dianisidine methanol solution (500 µg of O-dianisidine) (Sigma), 0.5 ml sample, and 0.1 ml substrate solution (175 µg of cadaverine dihydrochloride) (Sigma). Then the processed samples were incubated in an incubator chamber at 37°C for 30 min and measured at 436 nm by UV/visible spectrophotometer-UV-2450 (SHIMADZU, Japan) [24]. Plasma D-lactate was determined

**Table 2.** Composition and nutrient levels of basal diet (as-fed basis)<sup>1</sup>.

| Ingredients         | Contents(%) | Nutrition levels   | Contents(%) |
|---------------------|-------------|--------------------|-------------|
| Corn                | 61.25       | CP                 | 19.00       |
| Soybean meal        | 15.79       | DE/(MJ/Kg)         | 14.11       |
| Extruded-soybean    | 10.00       | Calcium            | 0.80        |
| Imported fish meal  | 5.00        | TP                 | 0.63        |
| Wheat bran          | 3.00        | AP                 | 0.40        |
| Soybean oil         | 1.74        | Lysine             | 1.15        |
| Premix <sup>2</sup> | 1.00        | Methionie+cysteine | 0.67        |
| Limestone           | 0.98        | Threonine          | 0.77        |
| CaHPO <sub>4</sub>  | 0.78        | Tryptophan         | 0.22        |
| Salt                | 0.37        |                    |             |
| Lysine-HCl          | 0.09        |                    |             |
| Total               | 100.00      |                    |             |

<sup>1</sup>NC = uncontaminated basal diet, DON = basal diet contaminated with deoxynivalenol (4 mg/kg), GLU = uncontaminated basal diet supplemented with 2% glutamic acid; DG = DON diet supplemented with 2% glutamic acid.

<sup>2</sup>Providing the following amount of vitamins and minerals per kilogram on an as-fed basis: Zn (ZnO), 50 mg; Cu (CuSO<sub>4</sub>), 20 mg; Mn (MnO), 55 mg; Fe (FeSO<sub>4</sub>), 100 mg; I (KI), 1 mg; Co (CoSO<sub>4</sub>), 2 mg; Se (Na<sub>2</sub>SeO<sub>3</sub>), 0.3 mg; vitamin A, 8,255 IU; vitamin D<sub>3</sub>, 2,000 IU; vitamin E, 40 IU; vitamin B<sub>1</sub>, 2 mg; vitamin B<sub>2</sub>, 4 mg; pantothenic acid, 15 mg; vitamin B<sub>6</sub>, 10 mg; vitamin B<sub>12</sub>, 0.05 mg; vitamin PP, 30 mg; folic acid, 2 mg; vitamin K<sub>3</sub>, 1.5 mg; biotin, 0.2 mg; choline chloride, 800 mg; and vitamin C, 100 mg. The premix did not contain additional copper, zinc, antibiotics, or probiotics.

CP: Crude Protein; DE: Digestible Energy; TP: Total Phosphorus; AP: Available Phosphorus.

doi:10.1371/journal.pone.0100591.t002

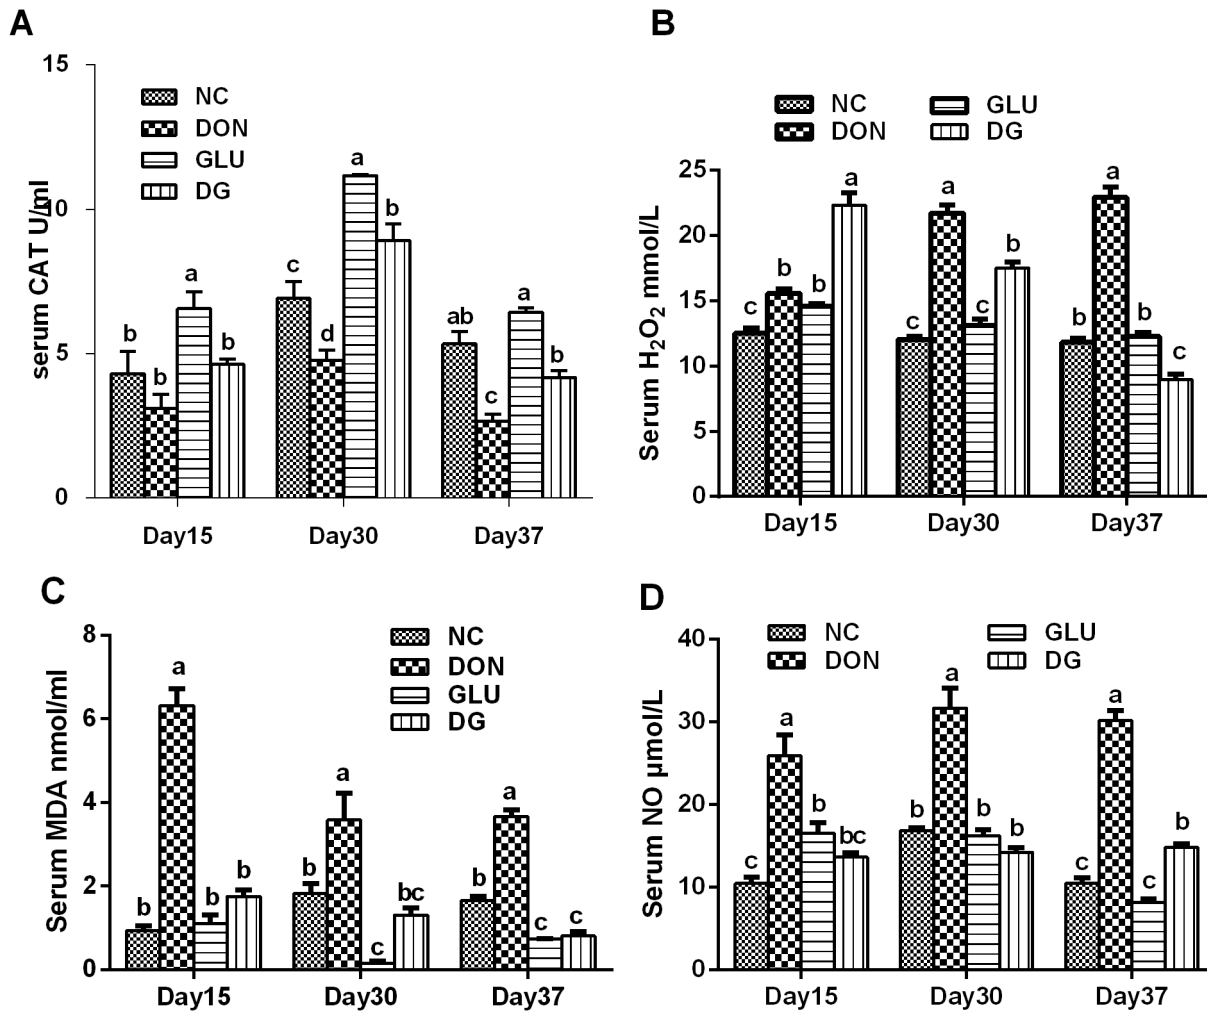

**Figure 1. Blood anti-oxidative capacity in each group.** A: CAT activity in each group. B: H<sub>2</sub>O<sub>2</sub> concentration in each group. C: MDA concentration in each group. D: NO concentration in each group. Dietary treatments were NC, an uncontaminated basal diet, DON, the basal contaminated with 4 mg/kg deoxynivalenol, GLU, uncontaminated basal diet with 2% (g/g) glutamic acid supplementation, and DG, deoxynivalenol-contaminated (4 mg/kg) basal diet with 2% (g/g) glutamic acid supplementation. Data are presented as means ± SEM, n=7, with a–c used to indicate a statistically significant difference (P<0.05, one way ANOVA method). CAT: catalase (U/ml); H<sub>2</sub>O<sub>2</sub>: hydrogen peroxide (mmol/L); MDA: methane dicarboxylic aldehyde (nmol/ml); NO: nitric oxide (μmol/L). doi:10.1371/journal.pone.0100591.g001

using assay kit in accordance with the manufacturer’s instruction (BioVision Inc., America). The serum was separated with centrifugation at 3,500×g for 15 min at 4°C and stored at –20°C. Concentrations of amino acids in the serum were detected via LC-MS/MS (HPLC Ultimate3000 and 3200 Q TRAP LC-MS/MS). Serum amino acids were analyzed with isotope dilution liquid chromatography-mass spectrometry methods by Beijing Amino Medical Research CO., LTD, Beijing, China.

**Histomorphometry determination**

Jejunum and ileum morphology were analyzed using hemotoxylin eosin (HE) stain morphology. After dehydration, embedding, sectioning and staining, villous height, crypt depth, goblet cell and lymphocyte counts were measured with computer-assisted microscopy (Micrometrics TM; Nikon ECLIPSE E200, Japan). For each intestinal segment, nine villus heights and crypt depths were measured using Motic Images Advanced 3.2. Measurements were taken in ten well-oriented villi and ten crypts from each intestinal tissue section of each piglet.

**Western blot analysis**

Western blot analysis was conducted according to a previous study [25]. Briefly, the equal amounts of proteins obtained from the ileum and jejunum samples were separated by a reducing SDS-PAGE electrophoresis. The proteins were transferred onto PVDF membranes (Millipore, MA, USA) and blocked with 5% non-fat milk in Tris-Tween buffered saline buffer (20 mM Tris, pH 7.5, 150 mM NaCl, and 0.1% Tween-20) for 3 hr. The following primary antibodies were incubated overnight at 4°C with gentle rocking: β-actin (Santa Vruz, 1:400), total 4EBP1 (T-4EBP1, Cell Signaling, 1:1000), phosphorylated 4EBP1 (Ser 65) (Cell Signaling, 1:1000), total Akt (T-Akt, Cell Signaling, 1:1000), phosphorylated Akt (Ser 473) (Cell Signaling, 1:1000), total mTOR (T-mTOR, Cell Signaling, 1:1000) or phosphorylated mTOR (Ser 2448) (Cell Signaling, 1:1000). Then, the HRP-conjugated secondary antibodies were subsequently incubated for 1 hr at room temperature before developing the blots using Alpha Imager 2200 software (Alpha Innotech Corporation, CA, USA). We digitally quantified the resultant signals and normalized the

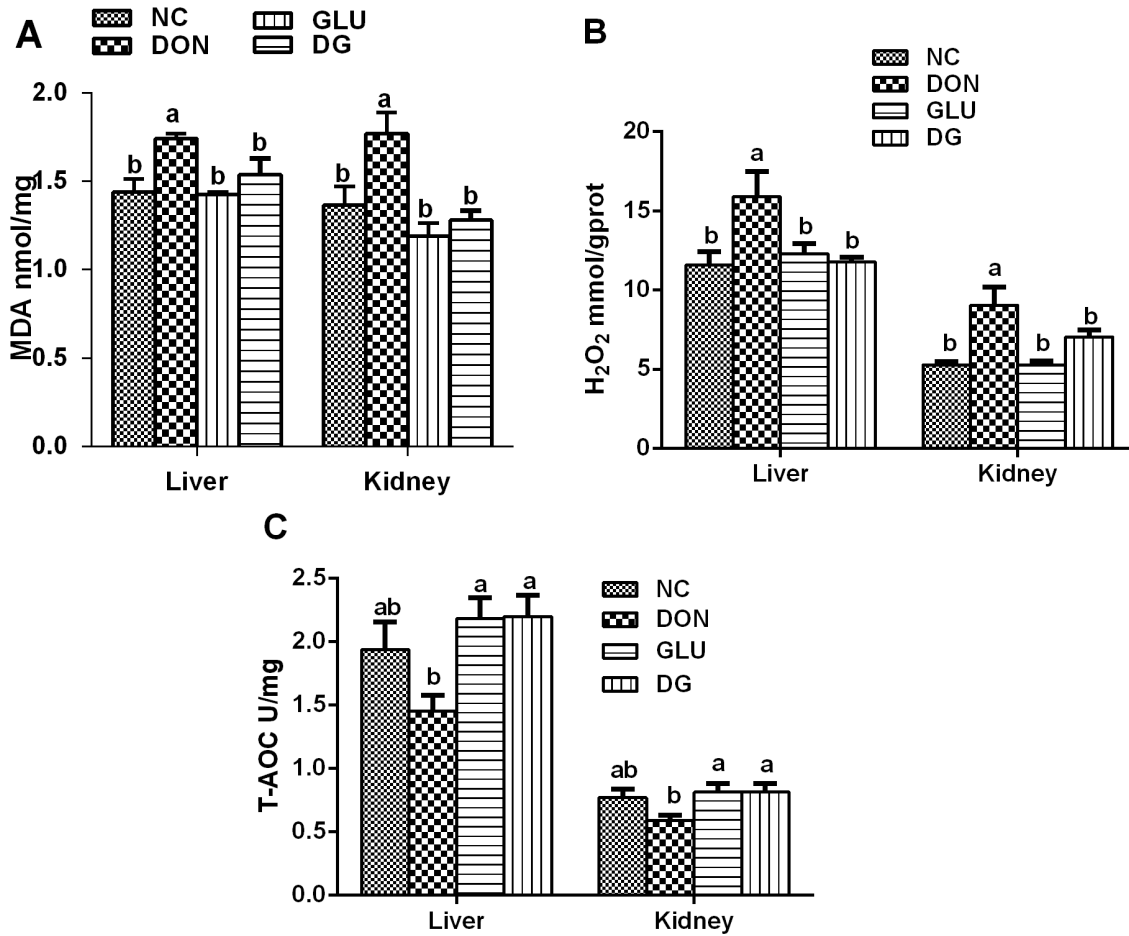

**Figure 2. Liver and kidney anti-oxidative capacity in each group.** A: MDA concentrations of liver and kidney in each group. B: H<sub>2</sub>O<sub>2</sub> concentrations of liver and kidney in each group. C: T-AOC of liver and kidney in each group. Dietary treatments were NC, an uncontaminated basal diet, DON, the basal contaminated with 4 mg/kg deoxynivalenol, GLU, uncontaminated basal diet with 2% (g/g) glutamic acid supplementation, and DG, deoxynivalenol-contaminated (4 mg/kg) basal diet with 2% (g/g) glutamic acid supplementation. Data are presented as means ± SEM, n = 7, with a–b used to indicate a statistically significant difference (P < 0.05, one way ANOVA method). MDA: methane dicarboxylic aldehyde (nmol/ml); H<sub>2</sub>O<sub>2</sub>: hydrogen peroxide (mmol/L); T-AOC: total antioxidant capacity (U/mg). doi:10.1371/journal.pone.0100591.g002

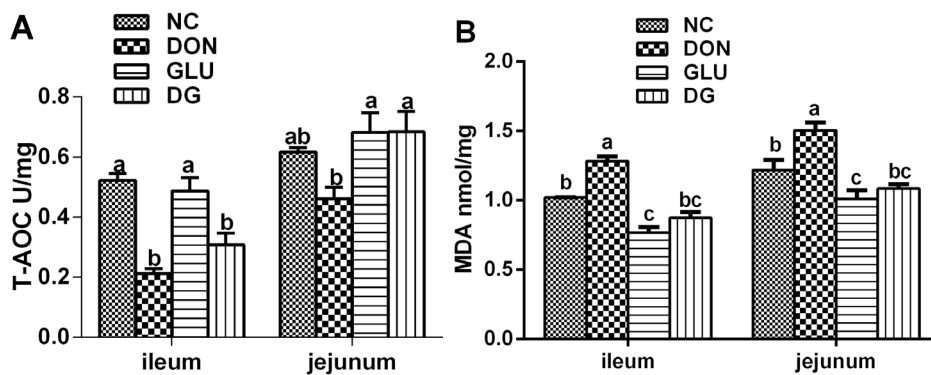

**Figure 3. Ileum and jejunum anti-oxidative capacity in each group.** A: T-AOC of ileum and jejunum in each group. B: MDA concentrations of ileum and jejunum in each group. Dietary treatments were NC, an uncontaminated basal diet, DON, the basal contaminated with 4 mg/kg deoxynivalenol, GLU, uncontaminated basal diet with 2% (g/g) glutamic acid supplementation, and DG, deoxynivalenol-contaminated (4 mg/kg) basal diet with 2% glutamic acid supplementation. Data are presented as means ± SEM, n = 7, with a–c used to indicate a statistically significant difference (P < 0.05, one way ANOVA method). MDA: methane dicarboxylic aldehyde (nmol/ml); T-AOC: total antioxidant capacity (U/mg). doi:10.1371/journal.pone.0100591.g003

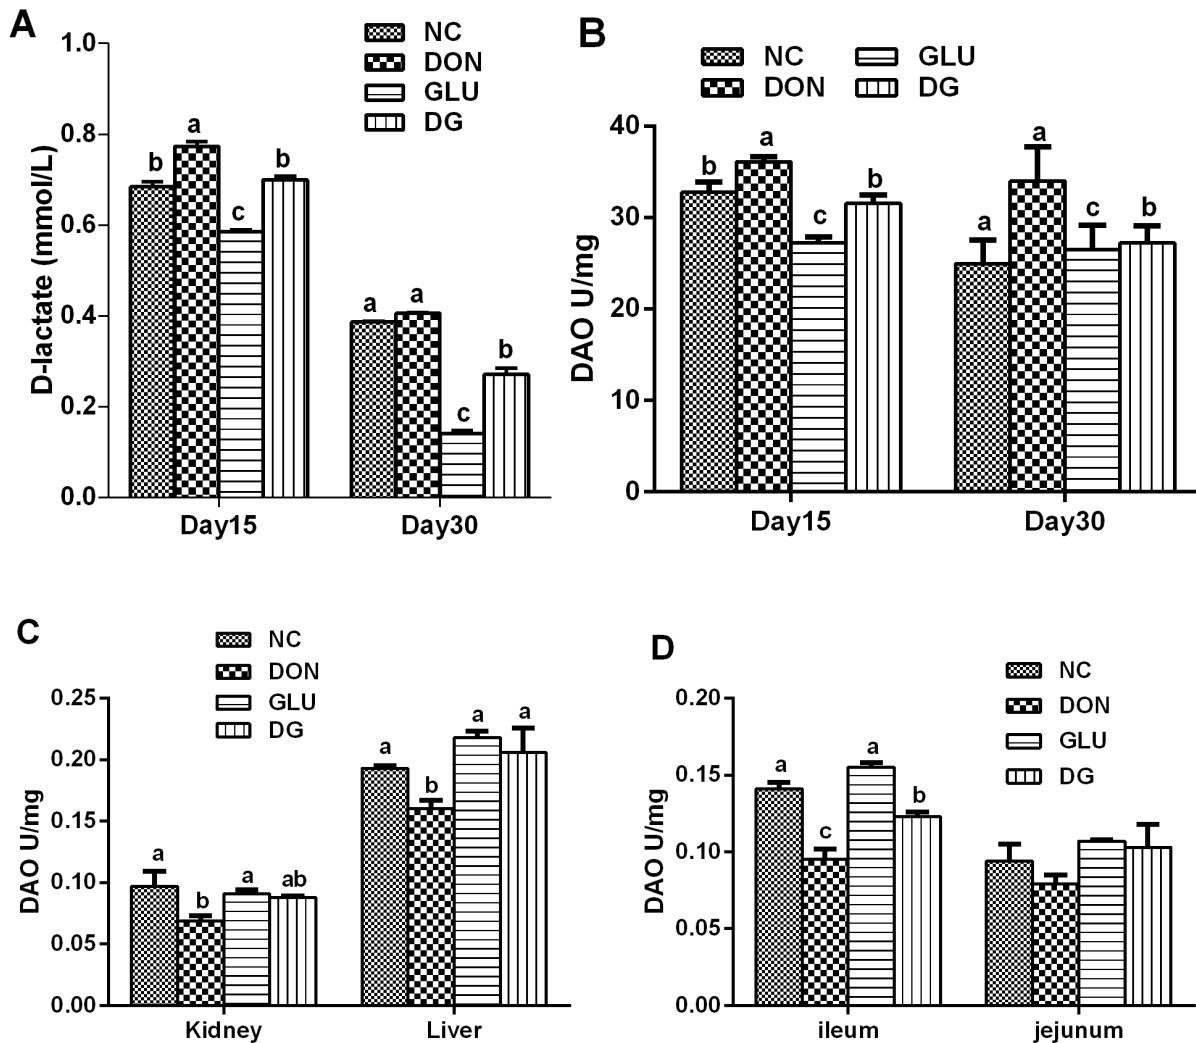

**Figure 4. Plasma DAO activity and D-lactate levels in each group.** A: Plasma D-lactate levels in each group on day 15 and day 30. B: Plasma DAO activity in each group on day 15 and day 30. C: DAO activity of kidney and liver in each group. D: DAO activity of ileum and jejunum in each group. Dietary treatments were NC, an uncontaminated basal diet, DON, the basal contaminated with 4 mg/kg deoxynivalenol, GLU, uncontaminated basal diet with 2% (g/g) glutamic acid supplementation, and DG, deoxynivalenol-contaminated (4 mg/kg) basal diet with 2% (g/g) glutamic acid supplementation. Data are presented as means  $\pm$  SEM, n = 7, with a–d used to indicate a statistically significant difference (P<0.05, one way ANOVA method). DAO: dlanine oxidase (U/mg). doi:10.1371/journal.pone.0100591.g004

data to the actin abundance.  $\beta$ -actin was used as an internal loading control for cytoplasmic protein fractions.

**Statistical Analysis**

Data are expressed as the mean  $\pm$  standard error of the mean (SEM). All statistical analyses were performed using the SPSS17.0 software (Chicago, IL, USA). Group comparisons were performed using Tukey multiple range test. Differences were considered significant at P $\leq$ 0.05.

**Results**

**Anti-oxidative capacity**

As shown in Figure 1A, DON significantly (P<0.05) decreased serum CAT activity compared with controls at day 30 and 37. This decrease was reversed by glutamic acid supplementation at day 30 and 37(P<0.05) (Figure 1A). The effect of glutamic acid on CAT is obvious because a higher CAT activity in the serum was

observed at day 15(P<0.05), 30(P<0.05) and 37(P>0.05), than the normal group (Figure 1A).

Serum H<sub>2</sub>O<sub>2</sub> levels in DON were higher (P<0.05) than those in the NC group at day 15, 30 and 37(Figure 1B). Glutamic acid supplementation significantly reduced (P<0.05) the serum H<sub>2</sub>O<sub>2</sub> concentration at day 30 and 37 (Figure 1B). Interestingly, a higher level of H<sub>2</sub>O<sub>2</sub> was observed in the piglets fed the DG at day 15 (Figure 1B).

Serum MDA (Figure 1C) and NO (Figure 1D) concentrations were higher (P<0.05) in piglets fed the DON diet than those fed the NC diet. These increases were remarkably (P<0.05) alleviated by glutamic acid supplementation.

Piglets consuming the DON diet had significantly (P<0.05) increased production of MDA (Figure 2A) and H<sub>2</sub>O<sub>2</sub> (Figure 2B) in the liver and kidney; while had little effect on the T-AOC activity in the liver and kidney, compared to those fed the NC diet. The production of MDA (Figure 2A) and H<sub>2</sub>O<sub>2</sub> (Figure 2B) in the liver and kidney was significantly lowered with glutamic acid

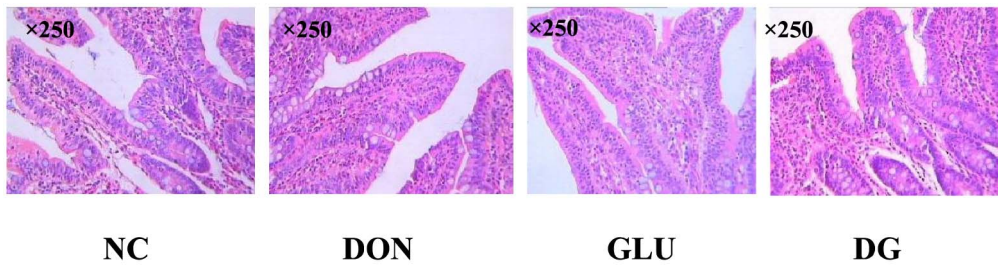

**A:** Ileal goblet cells.

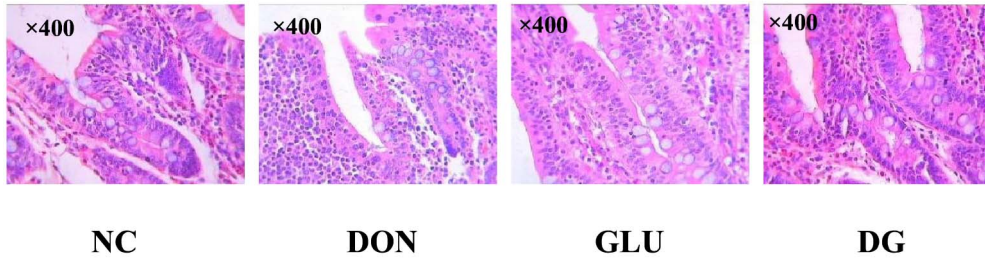

**B:** Ileal lymphocytes.

**Figure 5. Image of ileal goblet cells and ileal lymphocytes.** A: Ileal goblet cells ( $\times 250$ ). B: Ileal lymphocytes ( $\times 400$ ). Dietary treatments were NC, an uncontaminated basal diet, DON, the basal contaminated with 4 mg/kg deoxynivalenol, GLU, uncontaminated basal diet with 2% (g/g) glutamic acid supplementation, and DG, deoxynivalenol-contaminated (4 mg/kg) basal diet with 2% (g/g) glutamic acid supplementation.  $n = 7$  for treatments.

doi:10.1371/journal.pone.0100591.g005

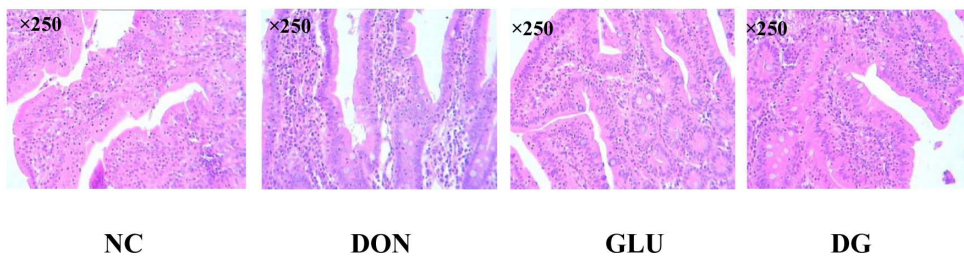

**A:** Jejunum goblet cells.

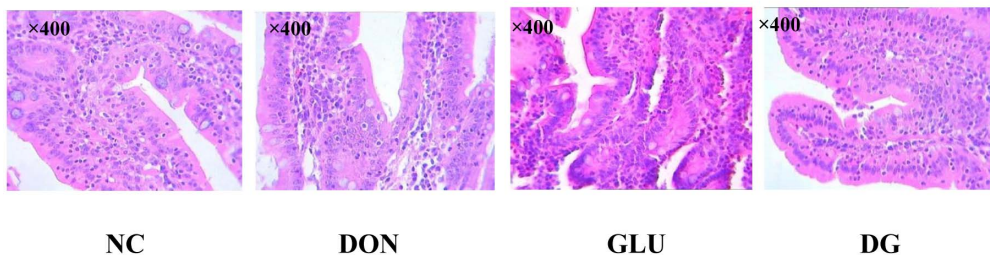

**B:** Jejunum lymphocytes.

**Figure 6. Image of jejunum goblet cells and jejunum lymphocytes.** A: Jejunum goblet cells ( $\times 250$ ). B: Jejunum lymphocytes ( $\times 400$ ). Dietary treatments were NC, an uncontaminated basal diet, DON, the basal contaminated with 4 mg/kg deoxynivalenol, GLU, uncontaminated basal diet with 2% (g/g) glutamic acid supplementation, and DG, deoxynivalenol-contaminated (4 mg/kg) basal diet with 2% (g/g) glutamic acid supplementation.  $n = 7$  for treatments.

doi:10.1371/journal.pone.0100591.g006

**Table 3.** Effect of glutamic acid supplementation on ileal and jejunum morphology in piglets fed a deoxynivalenol-contaminated diet.

| Variable                          |         | Diets <sup>1</sup>      |                        |                        |                         |
|-----------------------------------|---------|-------------------------|------------------------|------------------------|-------------------------|
|                                   |         | NC                      | DON                    | GLU                    | DG                      |
| Goblet cell                       | ileal   | 22.3±3.7                | 17.3±4.6               | 16.5±0.7               | 18.8±1.4                |
|                                   | jejunum | 10.0±2.5 <sup>b</sup>   | 17.7±4.1 <sup>a</sup>  | 9.25±1.55 <sup>b</sup> | 11.0±1.1 <sup>b</sup>   |
| villus height (VH, μm)            | ileal   | 263±8 <sup>a</sup>      | 171±11 <sup>c</sup>    | 271±8 <sup>a</sup>     | 202±4 <sup>b</sup>      |
|                                   | jejunum | 245±7 <sup>ab</sup>     | 200±11 <sup>b</sup>    | 252±12 <sup>ab</sup>   | 234±16 <sup>a</sup>     |
| crypt depth (CD, μm)              | ileal   | 118±14                  | 111±4                  | 114±7                  | 99.6±1.9                |
|                                   | jejunum | 116±2 <sup>ab</sup>     | 156±19 <sup>a</sup>    | 106±6 <sup>b</sup>     | 110±8 <sup>b</sup>      |
| lymphocyte                        | ileal   | 181±2 <sup>c</sup>      | 232±6 <sup>a</sup>     | 171±3 <sup>c</sup>     | 214±2 <sup>b</sup>      |
|                                   | jejunum | 195±19 <sup>c</sup>     | 256±6 <sup>a</sup>     | 203±16 <sup>c</sup>    | 218±18 <sup>b</sup>     |
| villus height/crypt depth (VH/CD) | ileal   | 2.32±0.15 <sup>a</sup>  | 1.73±0.07 <sup>b</sup> | 2.40±0.09 <sup>a</sup> | 1.95±0.01 <sup>ab</sup> |
|                                   | jejunum | 2.11±0.10 <sup>ab</sup> | 1.86±0.11 <sup>b</sup> | 2.25±0.06 <sup>a</sup> | 2.13±0.03 <sup>ab</sup> |

n = 7. <sup>1</sup>NC = uncontaminated basal diet, DON = basal diet contaminated with deoxynivalenol (4 mg/kg), GLU = uncontaminated basal diet supplemented with 2% glutamic acid; DG = DON diet supplemented with 2% glutamic acid. Data are presented as means ± SEM, n = 7, with a-c used to indicate a statistically significant difference (P<0.05, one way ANOVA method). doi:10.1371/journal.pone.0100591.t003

supplementation. Meanwhile, in the liver, the T-AOC activity in DG group was higher (P<0.05) than those in the DON group (Figure 2C).

In the ileum, the T-AOC concentration was lower (P<0.05) for piglets fed the DON-contaminated diets than those fed the NC diets, while DON had little effect on the jejunum (Figure 3A). In the ileum and jejunum, MDA content was higher (P<0.05) in the piglets fed the DON diet than in those fed the other diets (Figure 3B). The beneficial function of glutamic acid supplementation was observed again by increased T-AOC activity in DG group in the jejunum, and decreased MDA levels in DG group in

the ileum and jejunum, compared to the DON groups. (P<0.05) (Figure 3).

**DAO activity, D-lactate levels and Histological Evaluation**

DAO activity in serum and tissue, and D-lactate levels in serum are useful biomarkers for evaluating the integrity of the gastrointestinal tract [26]. As shown in Figure 4, feeding the DON diet increased the plasma D-lactate concentration by 13.0% at day 15, while DON had little effect on plasma D-lactate concentration at day 30, compared with the piglets feed the NC diet. However, supplementing the DON-contaminated diet with 2% glutamic acid reduced (P<0.05) plasma D-lactate level by

**Table 4.** Effect of dietary supplementation with glutmic acid on serum amino acids levels (μg/ml) in piglets fed a deoxynivalenol-contaminated diet on day 15.

| Item            | NC                       | DON                      | GLU                      | DG                       |
|-----------------|--------------------------|--------------------------|--------------------------|--------------------------|
| L-histidine     | 18.99±1.62 <sup>ab</sup> | 13.47±0.46 <sup>c</sup>  | 22.91±1.08 <sup>a</sup>  | 16.55±1.51 <sup>bc</sup> |
| L-isoleucine    | 13.10±1.11               | 13.73±1.04               | 14.02±0.58               | 11.85±0.87               |
| L-leucine       | 25.85±2.03 <sup>a</sup>  | 19.64±1.17 <sup>b</sup>  | 23.32±0.74 <sup>ab</sup> | 22.53±0.45 <sup>ab</sup> |
| L-methionine    | 5.05±0.59 <sup>a</sup>   | 0.41±0.05 <sup>c</sup>   | 4.46±0.19 <sup>ab</sup>  | 3.21±0.14 <sup>b</sup>   |
| L-threonine     | 6.75±0.69 <sup>ab</sup>  | 4.68±0.46 <sup>b</sup>   | 8.84±0.76 <sup>a</sup>   | 6.96±0.55 <sup>ab</sup>  |
| L-asparagine    | 7.75±0.66 <sup>a</sup>   | 5.40±0.40 <sup>b</sup>   | 7.80±0.31 <sup>a</sup>   | 6.52±0.49 <sup>ab</sup>  |
| L-aspartic acid | 0.49±0.03                | 0.42±0.02                | 0.46±0.03                | 0.42±0.03                |
| L-glutamic acid | 9.28±0.52 <sup>a</sup>   | 7.74±0.11 <sup>b</sup>   | 9.26±0.67 <sup>a</sup>   | 8.99±0.42 <sup>ab</sup>  |
| L-ornithine     | 18.48±3.17 <sup>a</sup>  | 13.01±1.53 <sup>ab</sup> | 14.06±1.32 <sup>ab</sup> | 12.05±0.68 <sup>b</sup>  |
| L-cystine       | 1.50±0.27 <sup>a</sup>   | 1.10±0.15 <sup>ab</sup>  | 0.83±0.22 <sup>ab</sup>  | 0.57±0.25 <sup>b</sup>   |
| L-carnosine     | 0.45±0.04 <sup>a</sup>   | 0.30±0.04 <sup>b</sup>   | 0.26±0.03 <sup>b</sup>   | 0.24±0.03 <sup>b</sup>   |
| L-proline       | 46.02±3.85 <sup>a</sup>  | 39.36±2.77 <sup>ab</sup> | 32.66±2.02 <sup>b</sup>  | 37.73±1.56 <sup>ab</sup> |

NC = uncontaminated basal diet, DON = basal diet contaminated with deoxynivalenol (4 mg/kg), GLU = uncontaminated basal diet supplemented with 2% glutamic acid.; DG = DON diet supplemented with 2% glutamic acid. Data are presented as means ± SEM, n = 7, with a-b used to indicate a statistically significant difference (P<0.05, one way ANOVA method). doi:10.1371/journal.pone.0100591.t004

**Table 5.** Effect of dietary supplementation with glutamic acid on serum amino acids levels ( $\mu\text{g/ml}$ ) in piglets fed a deoxynivalenol-contaminated diet on day 30.

| Item            | NC                             | DON                           | GLU                           | DG                             |
|-----------------|--------------------------------|-------------------------------|-------------------------------|--------------------------------|
| L-histidine     | 29.41 $\pm$ 1.57               | 23.02 $\pm$ 1.06              | 22.19 $\pm$ 1.59              | 22.04 $\pm$ 1.03               |
| L-isoleucine    | 17.22 $\pm$ 1.16 <sup>a</sup>  | 12.64 $\pm$ 0.73 <sup>b</sup> | 16.63 $\pm$ 0.86 <sup>a</sup> | 14.33 $\pm$ 0.42 <sup>ab</sup> |
| L-leucine       | 30.64 $\pm$ 3.05 <sup>a</sup>  | 23.61 $\pm$ 1.29 <sup>b</sup> | 30.18 $\pm$ 0.91 <sup>a</sup> | 26.41 $\pm$ 1.17 <sup>ab</sup> |
| L-methionine    | 0.72 $\pm$ 0.07                | 0.51 $\pm$ 0.03               | 0.84 $\pm$ 0.09               | 0.70 $\pm$ 0.06                |
| L-threonine     | 12.99 $\pm$ 0.71               | 10.50 $\pm$ 0.97              | 11.04 $\pm$ 0.96              | 11.79 $\pm$ 0.70               |
| L-asparagine    | 10.20 $\pm$ 1.37               | 9.05 $\pm$ 0.93               | 9.70 $\pm$ 0.42               | 8.45 $\pm$ 0.47                |
| L-aspartic acid | 0.71 $\pm$ 0.05                | 0.61 $\pm$ 0.03               | 0.64 $\pm$ 0.02               | 0.66 $\pm$ 0.07                |
| L-glutamic acid | 10.82 $\pm$ 0.88 <sup>a</sup>  | 8.00 $\pm$ 0.34 <sup>b</sup>  | 10.84 $\pm$ 0.27 <sup>a</sup> | 9.63 $\pm$ 0.54 <sup>ab</sup>  |
| L-Ornithine     | 21.37 $\pm$ 4.23 <sup>ab</sup> | 13.01 $\pm$ 1.06 <sup>b</sup> | 28.23 $\pm$ 1.85 <sup>a</sup> | 23.98 $\pm$ 2.70 <sup>a</sup>  |
| L-cystine       | 1.54 $\pm$ 0.35 <sup>a</sup>   | 0.39 $\pm$ 0.03 <sup>b</sup>  | 1.39 $\pm$ 0.48 <sup>a</sup>  | 0.44 $\pm$ 0.05 <sup>b</sup>   |
| L-carnosine     | 0.53 $\pm$ 0.05                | 0.40 $\pm$ 0.03               | 0.40 $\pm$ 0.04               | 0.40 $\pm$ 0.02                |
| L-proline       | 35.61 $\pm$ 3.18               | 36.39 $\pm$ 0.50              | 45.51 $\pm$ 1.56              | 36.28 $\pm$ 0.63               |

NC = uncontaminated basal diet, DON = basal diet contaminated with deoxynivalenol (4 mg/kg), GLU = uncontaminated basal diet supplemented with 2% glutamic acid; DG = DON diet supplemented with 2% glutamic acid. Data are presented as means  $\pm$  SEM, n = 7, with a–b used to indicate a statistically significant difference ( $P < 0.05$ , one way ANOVA method).

doi:10.1371/journal.pone.0100591.t005

9.4% and 33.0% at day 15 and 30, respectively. DON significantly increased the plasma DAO activity by 10.2% (day 15), and 36.1% (day 30), while DON reduced ( $P < 0.05$ ) the DAO activity in the liver, kidney, and ileum by 17.1%, 28.9%, and by 32.6% on day 37, respectively, compared with the control. However, supplementing the DON-contaminated diet with 2% glutamic acid reduced ( $P < 0.05$ ) plasma DAO activity by 12.7% and 20.0%, at day 15 and 30, respectively, while increased DAO activity by 28.8%, 27.5%, and 29.5% in the liver, kidney, and ileum, at day 37, respectively.

As shown in Figures 5 and 6, Tables 3, there was no histological damage in the piglets fed the NC diet. However, compared with the NC diet, feeding the DON diet reduced ( $P < 0.05$ ) villus height in the ileum and jejunum, and increased lymphocytes ( $P < 0.05$ ) in

the ileum and jejunum, and goblet cells ( $P < 0.05$ ) in the jejunum. Feeding the DG diet increased ( $P < 0.05$ ) villus height in the ileum and jejunum, and reduced ( $P < 0.05$ ) lymphocytes, goblet cells, and crypt depth in the jejunum.

#### Intestinal signaling and amino acid profile

Feeding the DON diet generally reduced amino acid contents in the small intestine (Tables 4, 5, and 6), and these effects were significant ( $P < 0.05$ ) for L-isoleucine, L-methionine, L-threonine, L-asparagine, L-glutamic acid, and L-proline. However, feeding the DG diet increased the intestinal contents of these amino acids ( $P < 0.05$ ).

Although reports have suggested that many mycotoxins, including DON, may influence the MAPKs and/or PI3K

**Table 6.** Effect of dietary supplementation with glutamic acid on serum amino acids levels in piglets fed deoxynivalenol-contaminated feed on day 37.

| Item            | NC                            | DON                           | GLU                            | DG                            |
|-----------------|-------------------------------|-------------------------------|--------------------------------|-------------------------------|
| L-histidine     | 34.99 $\pm$ 1.68 <sup>a</sup> | 23.27 $\pm$ 2.65 <sup>b</sup> | 31.10 $\pm$ 2.91 <sup>ab</sup> | 34.62 $\pm$ 1.63 <sup>a</sup> |
| L-isoleucine    | 11.96 $\pm$ 0.96              | 8.91 $\pm$ 0.86               | 12.32 $\pm$ 0.18               | 10.83 $\pm$ 0.32              |
| L-leucine       | 27.59 $\pm$ 2.01              | 26.60 $\pm$ 2.22              | 28.03 $\pm$ 1.08               | 24.28 $\pm$ 1.69              |
| L-methionine    | 0.36 $\pm$ 0.01 <sup>bc</sup> | 0.26 $\pm$ 0.02 <sup>c</sup>  | 0.56 $\pm$ 0.04 <sup>a</sup>   | 0.38 $\pm$ 0.02 <sup>b</sup>  |
| L-threonine     | 9.54 $\pm$ 0.54 <sup>ab</sup> | 6.48 $\pm$ 0.63 <sup>c</sup>  | 11.18 $\pm$ 0.49 <sup>a</sup>  | 7.96 $\pm$ 0.46 <sup>bc</sup> |
| L-asparagine    | 8.33 $\pm$ 0.56 <sup>a</sup>  | 4.70 $\pm$ 0.26 <sup>b</sup>  | 8.13 $\pm$ 0.57 <sup>a</sup>   | 8.05 $\pm$ 0.53 <sup>a</sup>  |
| L-aspartic acid | 0.58 $\pm$ 0.06               | 0.54 $\pm$ 0.07               | 0.54 $\pm$ 0.05                | 0.47 $\pm$ 0.04               |
| L-glutamic acid | 10.24 $\pm$ 0.51 <sup>a</sup> | 3.45 $\pm$ 0.29 <sup>c</sup>  | 9.29 $\pm$ 0.19 <sup>ab</sup>  | 7.68 $\pm$ 0.52 <sup>b</sup>  |
| L-Ornithine     | 25.77 $\pm$ 3.43              | 18.93 $\pm$ 1.81              | 23.63 $\pm$ 4.35               | 17.11 $\pm$ 1.22              |
| L-cystine       | 1.07 $\pm$ 0.26               | 1.27 $\pm$ 0.24               | 0.96 $\pm$ 0.17                | 0.92 $\pm$ 0.09               |
| L-carnosine     | 0.45 $\pm$ 0.03 <sup>a</sup>  | 0.32 $\pm$ 0.04 <sup>b</sup>  | 0.63 $\pm$ 0.06 <sup>ab</sup>  | 0.52 $\pm$ 0.06 <sup>ab</sup> |
| L-proline       | 35.10 $\pm$ 2.01 <sup>a</sup> | 25.89 $\pm$ 0.92 <sup>c</sup> | 31.29 $\pm$ 1.06 <sup>ab</sup> | 30.16 $\pm$ 1.00 <sup>b</sup> |

NC = uncontaminated basal diet, DON = basal diet contaminated with deoxynivalenol (4 mg/kg), GLU = uncontaminated basal diet supplemented with 2% glutamic acid; DG = DON diet supplemented with 2% glutamic acid. Data are presented as means  $\pm$  SEM, n = 7, with a–c used to indicate a statistically significant difference ( $P < 0.05$ , one way ANOVA method).

doi:10.1371/journal.pone.0100591.t006



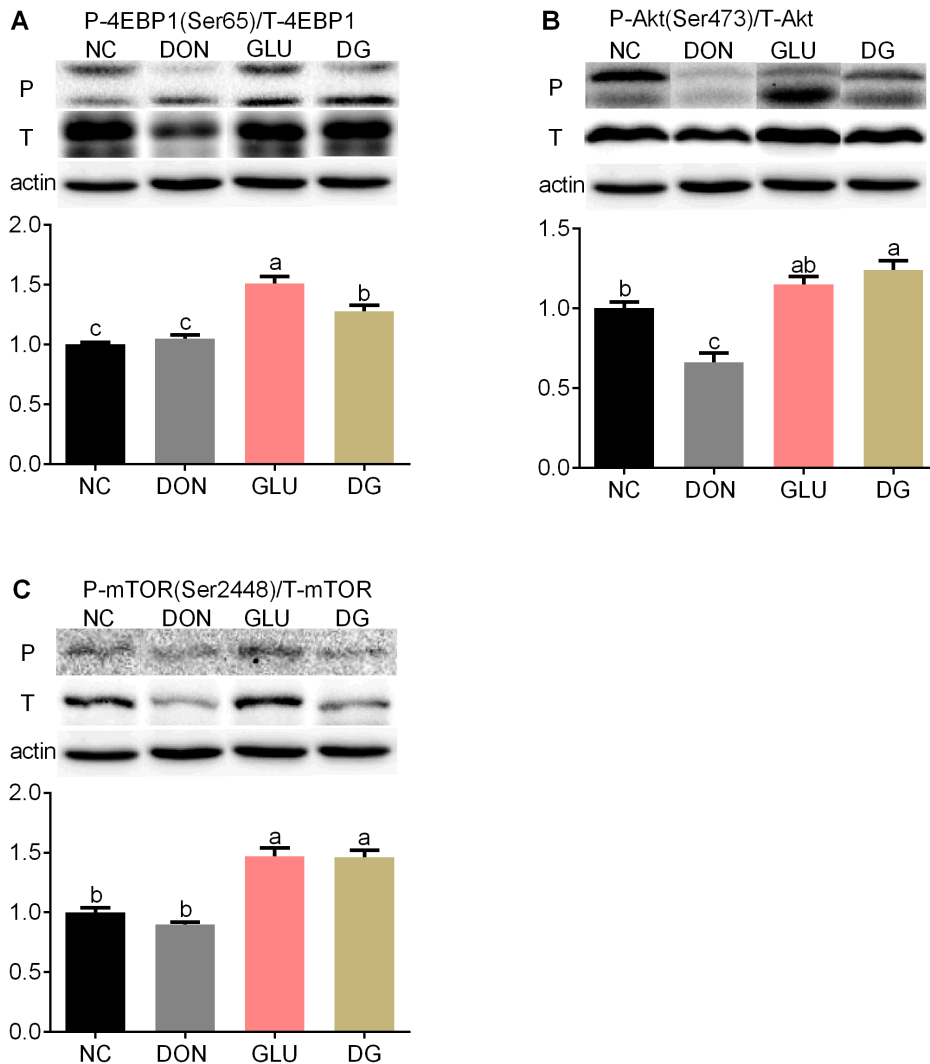

**Figure 7. Activation of mTOR in ileum.** (Up) Representative western blots of total 4EBP1(T-4EBP1), phosphorylated 4EBP1 (Ser65) (P-4EBP1), total Akt (T-Akt), phosphorylated Akt (Ser473) (P-Akt), total mTOR (T- mTOR), phosphorylated mTOR (Ser2448) (P- mTOR) in ileal of piglets fed the various dietary treatments.  $\beta$ -actin was the loading control. (Down) Quantification by image analysis of 4EBP1, Akt and mTOR phosphorylation. Dietary treatments were NC, an uncontaminated basal diet, DON, the basal contaminated with 4 mg/kg deoxynivalenol, GLU, uncontaminated basal diet with 2% (g/g) glutamic acid supplementation, and DG, deoxynivalenol-contaminated (4 mg/kg) basal diet with 2% (g/g) glutamic acid supplementation.  $n = 7$  for treatments. doi:10.1371/journal.pone.0100591.g007

signaling pathways [27], there is no evidence so far to show whether DON has an influence on the Akt/mammalian target of rapamycin (mTOR)/eukaryotic initiation factor 4e-binding protein 1(4EBP1) pathway. Previous studies reported that DON inhibits protein synthesis via binding to the 60S subunit of eukaryotic ribosomes [28] or activating the mitogen-activated protein (MAPK) signaling pathway [29,30]. Therefore, in the present study we investigated the protein expression levels of 4EBP1, p-4EBP1, Akt, p-Akt, mTOR and p-mTOR in the ileum and jejunum so as to elucidate the detailed mechanisms by which DON induces cell death. As shown in Figure 7 and 8, feeding the DON diet reduced ( $P < 0.05$ ) phosphorylation levels and total protein abundance of Akt in the ileum (Figure 7) and jejunum (Figure 8), and phosphorylation levels of 4EBP1 in the jejunum (Figure 8), compared with feeding the NC diet. Glutamic acid supplementation increased ( $P < 0.05$ ) the protein phosphorylation of 4EBP1 by 21.3% in the ileum (Figure 7) and 57.4% in the jejunum (Figure 8), the protein phosphorylation of Akt by 86.8%

( $P < 0.05$ ) in the ileum (Figure 7) and 203.2% ( $P < 0.05$ ) in the jejunum (Figure 8), the phosphorylation of mTOR by 61.5% in the ileum (Figure 7) and 33.2% in the jejunum (Figure 8), compared with the DON diet.

## Discussion

CAT activity, T-AOC,  $H_2O_2$ , NO and MDA levels are widely accepted markers for oxidative stress [22,31–34]. The present study showed that consuming DON-contaminated diets causes obvious oxidative stress to piglets from the change of analyzed indicators. Indeed, DON induced oxidative stress is widely observed in chickens [35], mice [36], pigs [13], rats [37], fish [38], and even cell lines isolated from human [39]. Intriguingly, our results demonstrated that supplementing glutamic acid to DON-contaminated piglet diet alleviates the oxidative stress caused by DON from the change of CAT, T-AOC, MDA and  $H_2O_2$ . It is well established that glutamate is involved in the

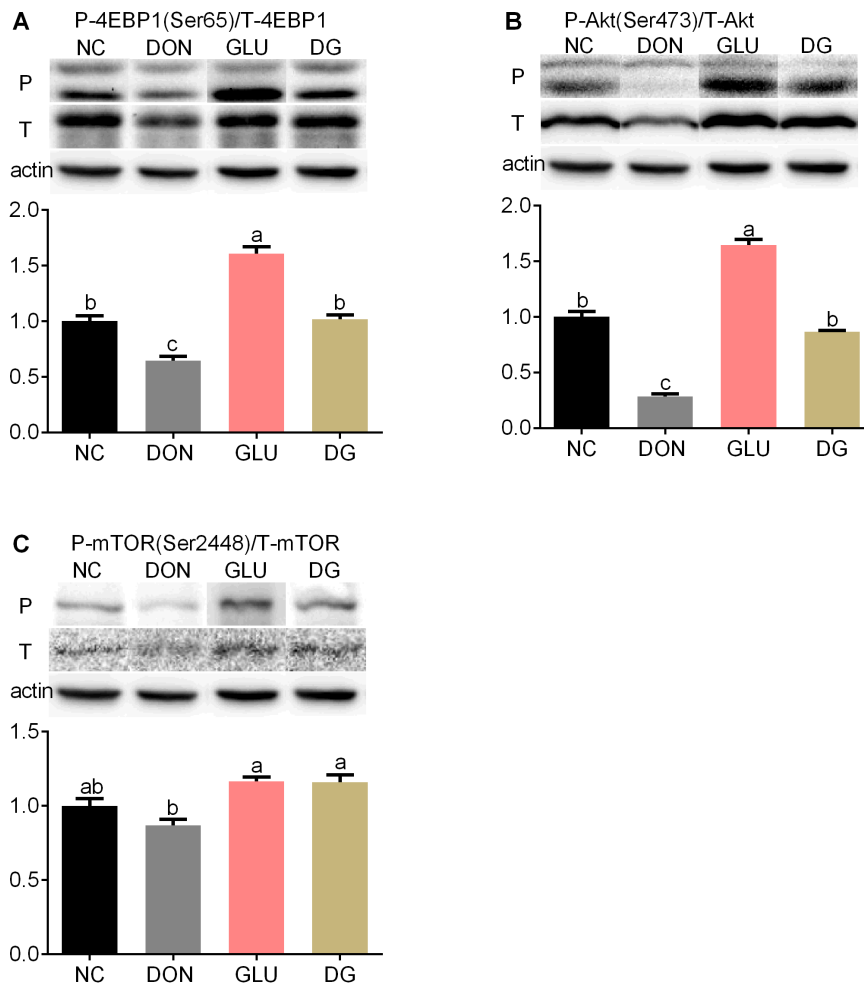

**Figure 8. Activation of mTOR in jejunum.** (Up) Representative western blots of total 4EBP1(T-4EBP1), phosphorylated 4EBP1 (Ser65) (P-4EBP1), total Akt (T-Akt), phosphorylated Akt (Ser473) (P-Akt), total mTOR (T- mTOR), phosphorylated mTOR (Ser2448) (P- mTOR) in jejunum of piglets fed the various dietary treatments.  $\beta$ -actin was the loading control. (Down) Quantification by image analysis of 4EBP1, Akt and mTOR phosphorylation. Dietary treatments were NC, an uncontaminated basal diet, DON, the basal contaminated with 4 mg/kg deoxynivalenol, GLU, uncontaminated basal diet with 2% (g/g) glutamic acid supplementation, and DG, deoxynivalenol-contaminated (4 mg/kg) basal diet with 2% (g/g) glutamic acid supplementation.  $n = 7$  for treatments. doi:10.1371/journal.pone.0100591.g008

oxidative response in body because L-glutamate is a precursor for glutathione, which is involved in the enterocyte redox state and in the detoxification process in enterocytes [40]. Further data about the serum GSH levels are needed to validate this explanation.

Reduced DAO activity in the intestine and kidney, and increased D-lactate level in serum are shown to correlate with the extent of histologic injury [41,42]. Thus, in addition to microscopic lesions in intestine, the D-lactate concentration in serum, and DAO activity in serum and tissue were also detected to assess the effects of DON exposure on intestinal barrier function. The increased blood D-lactate levels, and reduced intestinal and kidney DAO activity suggest that the intestinal barrier integrity is severely compromised by DON intake. This reasoning also is demonstrated by the microscopic observation in the jejunum and ileum. The reasonable contributors come from the effect DON on wall morphology, tight junction, inflammation, oxidative stress, epithelial proliferation [35,43,44]. Interestingly, DON affects the intestinal epithelial barrier from both the apical (luminal) and basolateral (serosal) side [45]. Compellingly, supplementing glutamic acid to DON-contaminated diets promotes the intestinal recovery in piglets. In fact, increasing investigations *in vivo* and

*in vitro* have demonstrated that glutamic acids exerts significant beneficial effects on intestinal barrier function [46,47]. This intestinal barrier dysfunction might be associated with intestinal metabolism because the concentration of amino acid has a downward trend in DON group, while seven amino acids in DG group are increased, compared to DON group. The possible explanation is that glutamic acid, in addition to being used for protein synthesis within the intestinal mucosa, can also be used by enterocytes to produce other amino acids [48,49].

The mTOR is a 289 kDa serine/threonine kinase, which plays a key role in regulating cell growth and proliferation [50]. Moreover, 4EBP1 is phosphorylated by mTOR to regulate translation initiation [51], whereas Akt contributes to mTOR activation [52]. Results showed that these proteins are significantly down-regulated after exposure to DON, indicating DON inhibits protein synthesis, consequently leading to decreased cell proliferation [53,54]. Previous report showed several mycotoxins, particularly DON, causes the cell cycle arrest in the Gap2/ Metaphase ( $G_2/M$ ) phase [55–57]. The  $G_2/M$  arrest in intestinal epithelium cells caused by DON is associated with its inhibition on Akt/mTOR pathway because the inhibition of Akt/mTOR

induces G<sub>2</sub>/M arrest in cells [58]. The levels of these proteins are up-regulated with dietary glutamic acid supplementation (DG group). This indicated that glutamic acid contributes to protein synthesis by regulating cell cycles. Indeed, previous studies have shown that glutamic acid appears to be involved in cellular signaling and growth regulation [15,59,60].

Taken together, our findings demonstrated that DON induces oxidative stress, and increases intestinal permeability, as well as inhibits protein synthesis and cell proliferation in weaned piglets. Glutamic acid supplementation decreases the oxidative stress and

the intestinal permeability, and reverses Akt/mTOR/4EBP1 signaling caused by DON, indicating glutamic acid is a useful nutritional regulator for DON damage.

## Author Contributions

Conceived and designed the experiments: MW XX. Performed the experiments: MW HX XX BT JY WR. Analyzed the data: MW XH JY GL LL. Wrote the paper: MW XX WR CMN GW.

## References

1. AE D (2006) Fusarium mycotoxins: Chemistry, genetics, and biology. St Paul: American Phytopathological Society.
2. Eriksen GS PH (2004) Toxicological evaluation of trichothecenes in animal feed. *Anim Feed Sci Technol* 114: 205–239.
3. Felicia W (2007) Measuring the economic impact of Fusarium toxins in animal feeds. *Anim Feed Sci Technol* 137: 363–374.
4. Pestka JJ, Smolinski AT (2005) Deoxynivalenol: Toxicology and potential effects on humans. *J Toxicol Env Heal B Vrit Rev* 8: 39–69.
5. Kolf-Clauw M, Castellote J, Joly B, Bourges-Abella N, Raymond-Letron I, et al. (2009) Development of a pig jejunal explant culture for studying the gastrointestinal toxicity of the mycotoxin deoxynivalenol: histopathological analysis. *Toxicol in Vitro* 23: 1580–1584.
6. Maresca M, Mahfoud R, Garmy N, Fantini J (2002) The mycotoxin deoxynivalenol affects nutrient absorption in human intestinal epithelial cells. *J Nutr* 132: 2723–2731.
7. Obremski K, Zielonka L, Gajecka M, Jakimiuk E, Bakula T, et al. (2008) Histological estimation of the small intestine wall after administration of feed containing deoxynivalenol, T-2 toxin and zearalenone in the pig. *Pol J Vet Sci* 11: 339–345.
8. Pinton P, Nougayrede JP, Del Rio JC, Moreno C, Marin DE, et al. (2009) The food contaminant deoxynivalenol, decreases intestinal barrier permeability and reduces claudin expression. *Toxicol Appl Pharmacol* 237: 41–48.
9. Vandembrouck V, Croubels S, Martel A, Verbrugghe E, Goossens J, et al. (2011) The mycotoxin deoxynivalenol potentiates intestinal inflammation by *Salmonella typhimurium* in porcine ileal loops. *PLoS one* 6: e23871.
10. Frankic T, Pajk T, Rezar V, Levart A, Salobir J (2006) The role of dietary nucleotides in reduction of DNA damage induced by T-2 toxin and deoxynivalenol in chicken leukocytes. *Food Chem Toxicol* 44: 1838–1844.
11. Li FQ, Luo XY, Yoshizawa T (1999) Mycotoxins (trichothecenes, zearalenone and fumonisins) in cereals associated with human red-mold intoxications stored since 1989 and 1991 in China. *Nat Toxins* 7: 93–97.
12. Pestka JJ, Smolinski AT (2005) Deoxynivalenol: toxicology and potential effects on humans. *J Toxicol Env Heal B Vrit Rev* 8: 39–69.
13. Xiao H, Wu MM, Tan BE, Yin YL, Li TJ, et al. (2013) Effects of composite antimicrobial peptides in weanling piglets challenged with deoxynivalenol: I. Growth performance, immune function, and antioxidation capacity. *J Anim Sci* 91: 4772–4780.
14. Wu L, Wang W, Yao K, Zhou T, Yin J, et al. (2013) Effects of dietary arginine and glutamine on alleviating the impairment induced by deoxynivalenol stress and immune relevant cytokines in growing pigs. *PLoS One* 8: e69502.
15. van Meijl LEC, Popejusz HE, Mensink RP (2010) Amino acids stimulate Akt phosphorylation, and reduce IL-8 production and NF-kappa B activity in HepG2 liver cells. *Mol Nutr Food Res* 54: 1568–1573.
16. Feng ZM, Zhou XL, Wu F, Yao K, Kong XF, et al. (2014) Both Dietary Supplementation with Monosodium L-Glutamate and Fat Modify Circulating and Tissue Amino Acid Pools in Growing Pigs, but with Little Interactive Effect. *PLOS ONE* 9: e84533.
17. Watford M (2008) Glutamine metabolism and function in relation to proline synthesis and the safety of glutamine and proline supplementation. *J Nutr* 138: 2003s–2007s.
18. Zhang J, Yin YL, Shu X, Li TJ, Li FN, et al. (2013) Oral administration of MSG increases expression of glutamate receptors and transporters in the gastrointestinal tract of young piglets. *Amino Acids* 45: 1169–1177.
19. Wu GY, Meininger CJ (2009) Nitric oxide and vascular insulin resistance. *Biofactors* 35: 21–27.
20. Wu GY, Fang YZ, Yang S, Lupton JR, Turner ND (2004) Glutathione metabolism and its implications for health. *J Nutr* 134: 489–492.
21. Reeds PJ, Burrin DG, Stoll B, Jahoor F, Wykes L, et al. (1997) Enteral glutamate is the preferential source for mucosal glutathione synthesis in fed piglets. *Am J Physiol-Endoc M* 273: E408–E415.
22. Ren W, Li Y, Yu X, Luo W, Liu G, et al. (2013) Glutamine modifies immune responses of mice infected with porcine circovirus type 2. *Bri J Nutr* 110: 1053–1060.
23. Ruth MR, Field CJ (2013) Consequences of supplementation with specific amino acids on the gut-associated lymphoid tissue. *Amino Acids* 45: 581–582.
24. Aarsen PN, Kemp A (1964) Rapid Spectrophotometric Micromethod for Determination of Histaminase Activity. *Nature* 204: 1195–&
25. Yang H, Fu D, Shao H, Kong X, Wang W, et al. (2012) Impacts of birth weight on plasma, liver and skeletal muscle neutral amino Acid profiles and intestinal amino Acid transporters in suckling huanjiang mini-piglets. *PLoS One* 7: e50921.
26. Packer RA, Moore GE, Chang CY, Zello GA, Abeyssekara S, et al. (2012) Serum D-Lactate Concentrations in Cats with Gastrointestinal Disease. *J Vet Intern Med* 26: 905–910.
27. Pestka JJ (2008) Mechanisms of deoxynivalenol-induced gene expression and apoptosis. *Food Addit Contam* 25: 1128–1140.
28. Rocha O, Ansari K, Doohan FM (2005) Effects of trichothecene mycotoxins on eukaryotic cells: a review. *Food Addit Contam* 22: 369–378.
29. Zhou HR, Islam Z, Pestka JJ (2003) Rapid, sequential activation of mitogen-activated protein kinases and transcription factors precedes proinflammatory cytokine mRNA expression in spleens of mice exposed to the trichothecene vomitoxin. *Toxicol Sci* 72: 130–142.
30. Jordanov MS, Pribnow D, Magun JL, Dinh TH, Pearson JA, et al. (1997) Ribotoxic stress response: Activation of the stress-activated protein kinase JNK1 by inhibitors of the peptidyl transferase reaction and by sequence-specific RNA damage to the alpha-sarcin/ricin loop in the 28S rRNA. *Mol Cell Biol* 17: 3373–3381.
31. Karithala P, Soini Y (2007) Reactive oxygen species and antioxidant mechanisms in human tissues and their relation to malignancies. *APMIS* 115: 81–103.
32. Ren W, Yin Y, Liu G, Yu X, Li Y, et al. (2012) Effect of dietary arginine supplementation on reproductive performance of mice with porcine circovirus type 2 infection. *Amino Acids* 42: 2089–2094.
33. Ren W, Liu S, Chen S, Zhang F, Li N, et al. (2013) Dietary L-glutamine supplementation increases *Pasteurella multocida* burden and the expression of its major virulence factors in mice. *Amino Acids* 45: 947–955.
34. Ren W, Zou L, Ruan Z, Li N, Wang Y, et al. (2013) Dietary L-proline supplementation confers immunostimulatory effects on inactivated *Pasteurella multocida* vaccine immunized mice. *Amino Acids* 45: 555–561.
35. Osselaere A, Santos R, Hautekiet V, De Backer P, Chiers K, et al. (2013) Deoxynivalenol impairs hepatic and intestinal gene expression of selected oxidative stress, tight junction and inflammation proteins in broiler chickens, but addition of an adsorbing agent shifts the effects to the distal parts of the small intestine. *PLoS one* 8: e69014.
36. Hou YJ, Zhao YY, Xiong B, Cui XS, Kim NH, et al. (2013) Mycotoxin-containing diet causes oxidative stress in the mouse. *PLoS One* 8: e60374.
37. Ngampongsa S, Hanafusa M, Ando K, Ito K, Kuwahara M, et al. (2013) Toxic effects of T-2 toxin and deoxynivalenol on the mitochondrial electron transport system of cardiomyocytes in rats. *J Toxicol Sci* 38: 495–502.
38. Sanden C, Leeb-Lundberg LM (2013) Kinin B1 receptor homo-oligomerization is required for receptor trafficking to the cell surface. *Int Immunopharmacol* 15: 121–128.
39. Kalaiselvi P, Rajashree K, Bharathi Priya L, Padma VV (2013) Cytoprotective effect of epigallocatechin-3-gallate against deoxynivalenol-induced toxicity through anti-oxidative and anti-inflammatory mechanisms in HT-29 cells. *Food Chem Toxicol* 56: 110–118.
40. Blachier F, Boutry C, Bos C, Tome D (2009) Metabolism and functions of L-glutamate in the epithelial cells of the small and large intestines. *Am J Clin Nutr* 90: 814s–821s.
41. Namikawa T, Fukudome I, Kitagawa H, Okabayashi T, Kobayashi M, et al. (2012) Plasma Diamine Oxidase Activity Is a Useful Biomarker for Evaluating Gastrointestinal Tract Toxicities during Chemotherapy with Oral Fluorouracil Anti-Cancer Drugs in Patients with Gastric Cancer. *Oncology* 82: 147–152.
42. Bragg LE, Thompson JS, West WW (1991) Intestinal Diamine Oxidase Levels Reflect Ischemic-Injury. *J Surg Res* 50: 228–233.
43. Goossens J, De Bock L, Osselaere A, Verbrugghe E, Devreese M, et al. (2013) The mycotoxin T-2 inhibits hepatic cytochrome P4503A activity in pigs. *Food Chem Toxicol* 57: 54–56.
44. Klunker LR, Kahlert S, Panther P, Diesing AK, Reinhardt N, et al. (2013) Deoxynivalenol and E. coli lipopolysaccharide alter epithelial proliferation and spatial distribution of apical junction proteins along the small intestinal axis. *J Anim Sci* 91: 276–285.
45. Nossol C, Diesing AK, Kahlert S, Kersten S, Kluess J, et al. (2013) Deoxynivalenol affects the composition of the basement membrane proteins

- and influences en route the migration of CD16(+) cells into the intestinal epithelium. *Mycotoxin Res* 29: 245–254.
46. Beutheu S, Ouelaa W, Guerin C, Belmonte L, Aziz M, et al. (2013) Glutamine supplementation, but not combined glutamine and arginine supplementation, improves gut barrier function during chemotherapy-induced intestinal mucositis in rats. *Clin Nutr*.
  47. Feng Y, Ralls MW, Xiao W, Miyasaka E, Herman RS, et al. (2012) Loss of enteral nutrition in a mouse model results in intestinal epithelial barrier dysfunction. *Annals of the New York Academy of Sciences* 1258: 71–77.
  48. Wu GY, Borbolla AG, Knabe DA (1994) The Uptake of Glutamine and Release of Arginine, Citrulline and Proline by the Small-Intestine of Developing Pigs. *J Nutr* 124: 2437–2444.
  49. Blachier F, Guihot-Joubrel G, Vaugelade P, Le Boucher J, Bernard F, et al. (1999) Portal hyperglutamemia after dietary supplementation with monosodium glutamate in pigs. *Digestion* 60: 349–357.
  50. Yin YL, Yao K, Liu ZJ, Gong M, Ruan Z, et al. (2010) Supplementing L-leucine to a low-protein diet increases tissue protein synthesis in weanling pigs. *Amino Acids* 39: 1477–1486.
  51. Brunn GJ, Hudson CC, Sekulic A, Williams JM, Hosoi H, et al. (1997) Phosphorylation of the translational repressor PHAS-I by the mammalian target of rapamycin. *Science* 277: 99–101.
  52. Inoki K, Corradetti MN, Guan KL (2005) Dysregulation of the TSC-mTOR pathway in human disease. *Nat Genet* 37: 19–24.
  53. Cannon M, Jimenez A, Vazquez D (1976) Competition between Trichodermin and Several Other Sesquiterpene Antibiotics for Binding to Their Receptor Site(S) on Eukaryotic Ribosomes. *Biochem J* 160: 137–145.
  54. Shifrin VI, Anderson P (1999) Trichothecene mycotoxins trigger a ribotoxic stress response that activates c-Jun N-terminal kinase and p38 mitogen-activated protein kinase and induces apoptosis. *J Biol Chem* 274: 13985–13992.
  55. Abid-Essefi S, Baudrimont I, Hassen W, Ouanes Z, Mobio TA, et al. (2003) DNA fragmentation, apoptosis and cell cycle arrest induced by zearalenone in cultured DOK, Vero and Caco-2 cells: prevention by Vitamin E. *Toxicol* 192: 237–248.
  56. Minervini F, Fornelli F, Flynn KM (2004) Toxicity and apoptosis induced by the mycotoxins nivalenol, deoxynivalenol and fumonisin B-1 in a human erythroleukemia cell line. *Toxicol in Vitro* 18: 21–28.
  57. Yang H, Chung DH, Kim YB, Choi YH, Moon Y (2008) Ribotoxic mycotoxin deoxynivalenol induces G(2)/M cell cycle arrest via P21(Cip/WAF1) mRNA stabilization in human epithelial cells. *Toxicol* 243: 145–154.
  58. Kuo PL, Hsu YL, Cho CY (2006) Plumbagin induces G(2)-M arrest and autophagy by inhibiting the AKT/mammalian target of rapamycin pathway in breast cancer cells. *Mol Cancer Ther* 5: 3209–3221.
  59. Hu CAA, Khalil S, Zhaorigetu S, Liu Z, Tyler M, et al. (2008) Human Delta(1)-pyrroline-5-carboxylate synthase: function and regulation. *Amino Acids* 35: 665–672.
  60. Fujita T, Yanaga K (2007) Association between glutamine extraction and release of citrulline and glycine by the human small intestine. *Life Sci* 80: 1846–1850.
